# Supplementary material for: Metabolic Profiling of Hypoxic Cells Revealed a Catabolic Signature Required for Cell Survival
Source: PLoS One. 2011 Sep 2;6(9):e24411. doi: 10.1371/journal.pone.0024411 (PMC3166325; doi:10.1371/journal.pone.0024411)
Supplement: Table S1 — Metabolomic database. Database of annotated compounds detectable by Orbitrap Exactive LC-MS by negative and positive ion mode. RT = retention time. (XLS) [file pone.0024411.s003.xls]

## Sheet: Neg
87	6	8		FRAGMENTS
88.04	12	14
89.02	5.5	7.5
103	6	9
130.05	13.5	14.5
130.99	5	8
133.01	7.8	8.8
146.04	12	14
173	7.5	8.5

## Sheet: Pos
90.05	12	14		Alanine		13.03	out of range
132.06	13.5	14.5		hydroxy proline		13.88	86.06
148.06	10	12		Oaceylserine		11.32	130.05	104.05	88.0392
A
90.05	12	14		Alanine		14.85								90.05	12	14		13.33
148.06	13.5	14.5		Glutamate		13.58	130.05	102.055	84.0443					118.08	11	13		11.54	72.0807
132.06				Amino Leuvinate		14.25	114.055	86.06						120.06	13.5	14.5	Homoserine	13.55	102.055	74.06
														227.1	14.5	17	Porphobilinogen
														258.1	8.7	9.4	Benserazide ,5-Methylcytidine ,Benserazide ,5-Methylcytidine
														399.14	24.3	25.3	S-Adenosyl-L-methionine+
D														110.02	13.5	14.5	Hypotaurine
120.06	13	14		Threonine		13.94								132.06	13	14	Glutamate 5-semialdehyde (isomer 5-Aminolevulinate; N-Acetyl-beta-alanine; 5-Amino-2-oxopentanoic acid; cis-4-Hydroxy-D-proline; )	13.49	86.0601	114
220.11	5.6	7		D-Pentothenic acid		6.01	202.107	184.097	116.034	90.0549				143.08	12	43	Ectoine	12.41
265.11	19	25		Thiamine		22.49	144.048	122.071						176.05	6.5	7.5	N-Formyl-L-glutamate (Isomer N-Acetyl-L-aspartate)	6.88	158.045	134.045	130.05	116.034	88.0393
118.086	11	14		Norvaline		11.42	72.0807							225.087	14	14.7	3-Hydroxy-L-kynurenine
104.07	12	15		3-Aminoisobutyric acid		13.85	87.044	86.06						104.071	12.5	13.5	GABA (isomer 3-Aminoisobutyric acid; N,N-Dimethylglycine; L-3-Amino-isobutanoate)
184.09	12	15		Normethine										228.232	5	7	Myristamide
														148.06	13.1	14.1	Glutamate	13.28	130.05	102.055	84.0443
														170.08	10	13	L-Noradrenaline	11.27	152.071
														265.11	23	24	Thiamine
E														220.11	5.6	7	D-Pentothenic acid
120.06	11	15		Homoserine		14.2	120.055	74.06	56.0494					146.11	11.7	12.5	Acetylcholine
118.08	11	13		Valine		11.91	72.0807							150.112	13.5	14.5	Triethanolamine
170.08	10	13		L-Noradrenaline		15.88	152.07							175.108	13	14	N-Acetylornithine
														261.144	9	10	Glutamyl-Leucine
														245.113	12.3	13	Glu Pro ,Pro Glu
336	C7H16NO2+	Acetylcholine	146.118	11.974										209.092	9.5	10.2	L-Kynurenine (Isomer Formyl-5-hydroxykynurenamine)
414	C6H15NO3	Triethanolamine	150.112	13.559										298.097	24.1	25.4	5'-Methylthioadenosine
785	C7H14N2O3	N-Acetylornithine	175.108	13.18										259.092	7.3	8	(1-Ribosylimidazole)-4-acetate
863	C11H20N2O5	Glutamyl-Leucine	261.144	10.896										138.055	12.5	13.5	4-Aminobenzoate (isomer Anthranilate Methylnicotinic acid)
992	Metlin	Glu Pro ,Pro Glu	245.113	12.463										251.037	13.6	14	4-(4-hydroxyphenyl)sulfonylphenol
1593	C10H12N2O3	L-Kynurenine (Isomer Formyl-5-hydroxykynurenamine)	209.092	9.729
2124	C11H15N5O3S	5'-Methylthioadenosine	298.097	24.762
Need Confirm 1286	C10H14N2O6	(1-Ribosylimidazole)-4-acetate	259.092	7.547
Need confirm 362	Metlin	3-O-Methylisoproterenol ,Terbutaline ,N-Methylmescaline	226.144	8.941	rubbish
Need Confirm 879	C6H6N2O2	Urocanate	139.05	10.897	rubbish
NEED Confirm 888	C7H7NO2	4-Aminobenzoate (isomer Anthranilate Methylnicotinic acid)	138.055	12.821
NEED Confirm 894	C12H10O4S	4-(4-hydroxyphenyl)sulfonylphenol	251.037	13.537
										217.105
											6.541
										Atrazine
												Rubish

## Sheet: Database on Hilic-MS
Metabolite	M/Z	RT	Comments
Pyruvic acid	87.0088	6.5	To confirm
Lactic acid	89.0244	6.8	STD
Ketobutyric acid	101.025	8.1	STD
Malonic acid	103.004	6.88	STD
Hydroxybutyric acid	103.04	8.1	STD
Glycolic acid	105.019	10.8	STD
Fumaric acid	115.004	7.7	To confirm
Succinic acid	117.019	7.6	STD
Malic acid	133.014	8.1	To confirm
a-Ketoglutaric acid	145.014	12.9	STD
Hydroxyglutarate	147.03	6.69	To confirm
Pentose (D-Ribose D-Arabinose D-Xylose D-Lyxose)	149.046	14.2	To confirm
Hydroxy Phenylacetic acid	151.04	6.3	To confirm
Hydroxyketoglutaric acid	161.009	12.9	To confirm
Deoxyhexose	163.061	12.4	STD
Phosphoenolpyruvate	166.975	16.25	To confirm
Glyceraldehyde-Phosphate	168.991	14.11	STD
Glyceraldehyde phosphate	171.006	28	STD
Glycerolphosphate	171.006	14.066	STD
Phenol Phosphate	171.992	28	STD
cis-Aconitate (Bad Shape)	173.009	8.1	To confirm
2-Isopropyl-3-oxosuccinate	173.046	14.213	To confirm
Ascorbic acid	175.024	7.8	To confirm
Gluconolactone	177.04	13.9	To confirm
Glucose,Frutose, Galactose (Hexose)	179.056	13.4	STD
Hexitol	181.071	12.4	To confirm
D-Sorbitol	181.072	12.05	STD
Citric acid (Bad Shape)	191.019	19.6	To confirm
D-Gluconic acid	195.051	14.33	To confirm
Ribitol, FA adducts	197.067	11.166	To confirm
Erythrose-4-Phosphate	199.001	14.51	STD
Hexose FA adducts	225.062	12.3	STD
Ribose-1-Phosphate (Pentose Phosphate)	229.012	13.53	STD
Ribose-5-Phosphate (Pentose Phosphate)	229.012	14.28	STD
Xylulose-5-Phosphate (Pentose Phosphate)	229.012	14.25	To confirm
D-Glucosamine 6-phosphate	258.038	13.334	STD
Glucose phosphate (Hexose Phosphate)	259.022	14.31	To confirm
a-D-Galactose-1-Phosphate	259.022	14.54	STD
D-Fructose-1-Phosphate (Hexose Phosphate)	259.022	14.18	To confirm
D-Fructose-6-Phosphate (Hexose Phosphate)	259.022	14.54
2,3-Bisphospho-D-glycerate	264.952	13.648
N-Acetyl-alpha-D-glucosamine 1-phosphate	300.049	13.69	STD
Pentose-hexose	311.098	17.3
Lactose, Maltose, Melibiose, Sucrose, ( H and FA adducts)	387.115	13.105	STD
Uridine 5-diphophoglucose	565.048	19.55	STD
Tetrahexose	665.212	20.4	Tailing
Pentahexose	863.242	20.6	Phosphoenolpyruvate
Glycine	76.0393	15.31	STD
2-Aminoacrylate	88.0393	17.44	STD
L-Alanine	90.0549	13.3	STD
Sarcosine	90.0549	14.11
beta-Alanine	90.055	14.1	To confirm
Phosphoric acid	98.9843	15.16	To confirm
1-Aminocyclopropane-1-carboxylate	102.055	13.85
Homoserine Lacotone	102.055	15.97	To confirm
GABA	104.071	13.18	STD
Choline	104.107	14.02	To confirm
L-Serine	106.05	15.43
Cytosine	112.051	13.11
Histamine	112.087	25.9	STD
Hydroxymethyl Phosphonic acid	113	13.95
Uracil	113.035	10.6
Creatinine	114.066	15.13
L-Proline	116.071	13.04
5-Aminopentanamide	117.102	16.88	To confirm
L-Valine	118.086	12.37	STD
Betaine	118.086	13.76	STD
L-Homoserine	120.066	14.21
L-Threonine	120.066	13.94
L-Cysteine	122.027	12.98
Isonicotinic acid	124.039	8.48	STD
Niacin/Nicotinate	124.039	7.43	STD
Taurine	126.022	13.49
Thymine	127.05	15.2
5,6-Dihydrothymine	129.066	16.1	STD
5-Oxproline	130.05	6.93
Methyl Proline	130.086	13.4	STD
5-Aminolevulinate	132.065	13.88	STD
cis-4-Hydroxy-Proline	132.065	14.51	STD
L-Asparagine	133.061	15.1	STD
L-Ornithine	133.097	23	STD
Thioproline	134.027	12.02
L-Aspartate	134.045	14.36
Homocysteine	136.043	12.61	STD
Adenine	136.062	12.93	To confirm
Hypoxanthine	137.046	8.77
Phosphoethanolamine +	142.026	18.2	To confirm
Ectoine	143.082	14.23	To confirm
Proline Betaine	144.102	14.4	STD
Methyl Hydroxyproline	146.081	18.9	To confirm
4-Guanidinobutanoate	146.093	14.59	To confirm
AcetylCholine	146.118	12.08
Spermidine	146.165	27.85	To confirm
L-Glutamine	147.076	14.96	To confirm
L-Lysine	147.113	21.4	To confirm
L-Glutamate	148.06	14.47	STD
L-Methionine	150.058	11.7	To confirm
Methyl Adenine	150.078	15.1	STD
Guanine	152.057	12.36
Xanthine	153.041	7.9	STD
N-acetylHistamine	154.098	14.7
Imidazol-5-yl-pyruvate	155.045	8.87	STD
L-Histidine	156.077	22.24
Allantoin	159.052	15.1
5-Acetamidopentanoate	160.097	13.92
Indole carboxylic acid	162.055	7.07	To confirm
O-Acetyl-L-homoserine	162.076	11.49	To confirm
Carnitine	162.113	13.44	STD
Pterin	164.057	11.9	STD
Coumaric acid	165.055	5.33	STD
Methionine S-oxide	166.053	15.1	STD
L-Phenylalanine	166.086	10.51	STD
Hydroxyguanine	168.049	17.7	STD (Be careful of Fragments Threonine)
Pyridoxal	168.066	11.39	To confirm
Urate	169.036	10
L-Noradrenaline	170.081	15.88
Pyridoxine	170.081	11.08
1-Methylhistidine	170.092	20.23	STD
N-Acetyl-L-glutamate 5-semialdehyde	174.076	13.96
Ornithine acetate	175.108	16.2
L-Arginine	175.119	21.08	To confirm
N-AcetylAspartate	176.056	9.1	STD
L-Citrulline	176.103	15.71	STD
Xanthopterin	180.052	12.1	STD
Dihydroxanthopterin	182.068	12.1	STD
L-Tyrosine	182.081	12.23
4-Pyridoxate	184.061	7.26	STD
Phosphocholine +	184.073	18.4	STD
O-Phospho-L-serine	186.016	15.02	STD
N2-Acetyl-L-aminoadipate semialdehyde	188.092	13.63	STD
N-acetylspermidine	188.176	25.2	STD
N6-Acetyl-L-lysine	189.16	13.76	STD
Kynurenic acid	190.05	6.17	STD
N-AcetylGlutamate	190.071	6.9	STD
5-Hydroxyindoleacetate	192.066	10.01
Oxoxanthopterin	192.075	22.14	STD
Hydromethyldeoxyhydropterin	196.047	10.5	STD
DOPA quinone	196.061	8	STD
Methyl Tyrosine	196.097	12	STD
Valine phosphate	198.053	17.1
DOPA	198.076	16.8
Formyl Val-Gly	203.103	8.7
O-Acetylcarnitine	204.123	10.7	STD
L-Tryptophan	205.097	11.12	STD
N6-Acetyl-N6-hydroxy-L-lysine	205.118	16.53	STD
Quinaldic acid	206.045	7.19	STD
Xanthurenate	206.045	9.5	STD
Cyclothionine	206.048	12.2	STD
Kynurenine	209.092	12.7	STD
4-Hydroxyphenylacetylglycine	210.076	15	STD
Dethiobiotin	215.139	14.01	STD
Pro-Val	215.139	14	STD
Diacetyl Ornithine	217.118	8
AcetylArginine	217.13	16
Propylcarnitine	218.139	12.2
N2-(D-1-Carboxyethyl)-L-lysine	219.134	13.69
Pantothenic acid	220.118	6.84	To confirm
Hydroxytryptophan	221.092	10.62
Pyrimidodiazopterin	222.099	9.9
Guanidino Inositol	222.109	17.3
L-Cystathionine	223.075	18.79
3-Hydroxy-L-kynurenine	225.087	14.2	To confirm
4-Amino-4-deoxychorismate	226.071	8.81	To confirm
Myristamide	230.248	9	To confirm
PropionylArginine	231.145	14.6	To confirm
Valineleucine	231.171	11.3	STD
Dehydrobiopterin	236.078	8.4
Methyl Guanidino inositol	236.125	17.1
N-FormylKynurenine	237.087	13.8
Dihydrobiopterin	240.109	10.99	STD
L-Cystine	241.031	18.77
L-Cytidine	244.093	16.6
Uridine	245.077	8.81	STD
Octopine	247.14	15.27
Deoxyadenosine	252.109	7
PhosphoArginine	255.086	20.8	To confirm
Glycyl-Dopa	255.098	13.81	STD
Glycerophosphocholine	258.11	18.3
Tyrosine phosphate	262.048	17.9	To confirm
Thiamine	265.112	23.29
Adenosine	268.104	12.6
Homocystine	269.062	17.8	STD
Inosine	269.088	8.94
Narigenin	273.075	12.2
Linoleamide	280.264	5
Methyl Adenosine	282.12	16.2	STD
Oleoamide	282.28	5.4
Guanosine	284.099	10.49	STD
Xanthosine	285.083	9.01
Methyl Dihydroinosine	285.12	20.6	STD
Ophthalmic acid	290.135	12.41	To confirm
Argininosuccinic acid	291.13	21
Cinchonine	295.18	14.34
5'-Methylthioadenosine	298.097	8.24	STD
Methyl Guanosine	298.115	10.8
Dihydromethylguanosine	300.131	12.95
GSH	308.091	13.04
CMP	324.059	18.4	STD
Uridine monophosphate	325.043	15.4	To confirm
Galactosylhydroxylysine	325.161	23.11	To confirm
cAMP	330.06	14.4
cGMP	346.055	15.8	STD
AMP	348.071	16.25	STD
IMP	349.054	15.8	STD
Lactose ammonium	360.151	16.08
Guanidinosphingolipid	361.134	14.4	STD
GMP	364.065	18.1	STD
Drosopterin	369.153	17.7	To confirm
Riboflavin	377.146	9.49	STD
SuccinylAdenosine	384.115	10.7
S-adenosylmethionine	399.144	24.3
Xanthomattin	424.079	12.7
Linolenylcarnitine	424.343	10.11	STD
Linolylcarnitine	426.359	10.11	STD
Oleoylcarnitine	428.374	9.8	STD
Folate	442.147	8.51	To confirm
Tetrahydrofolate	446.179	12.7
Taurocholate	516.299	4.83
Protoporphyrin	563.265	5.03	STD
Billirubin	585.27	5.03
Glutathione Disulfide	613.159	18.81
NAD+	664.117	15.41

## Sheet: Sheet1
	Metabolite	M/Z
	Glycine	76.0393
	Pyruvic acid	87.0088
	2-Aminoacrylate	88.0393
	Lactic acid	89.0244
	L-Alanine	90.0549
	Sarcosine	90.0549
	beta-Alanine	90.055
	Phosphoric acid	98.9843
	Ketobutyric acid	101.025
	1-Aminocyclopropane-1-carboxylate	102.055
	Homoserine Lacotone	102.055
	Malonic acid	103.004
	Hydroxybutyric acid	103.04
	GABA	104.071
	Choline	104.107
	Glycolic acid	105.019
	L-Serine	106.05
	Cytosine	112.051
	Histamine	112.087
	Hydroxymethyl Phosphonic acid	113
	Uracil	113.035
	Creatinine	114.066
	Fumaric acid	115.004
	L-Proline	116.071
	Succinic acid	117.019
	5-Aminopentanamide	117.102
	L-Valine	118.086
	Betaine	118.086
	L-Homoserine	120.066
	L-Threonine	120.066
	L-Cysteine	122.027
	Isonicotinic acid	124.039
	Niacin/Nicotinate	124.039
	Taurine	126.022
	Thymine	127.05
	5,6-Dihydrothymine (Isomer gamma-Amino-gamma-cyanobutanoate)	129.066
	5-Oxproline(Pyroglutamate)	130.05
	Methyl Proline	130.086
	5-Aminolevulinate	132.065
	cis-4-Hydroxy-Proline	132.065
	Malic acid	133.014
	Tetrahydrothiophene carboxylic acid	133.032
	L-Asparagine	133.061
	L-Ornithine	133.097
	Thioproline	134.027
	L-Aspartate	134.045
	Homocysteine	136.043
	Adenine	136.062
	Hypoxanthine	137.046
	Phosphoethanolamine +	142.026
	Ectoine	143.082
	Proline Betaine	144.102
	a-Ketoglutaric acid	145.014
	Methyl Hydroxyproline	146.081
	4-Guanidinobutanoate	146.093
	Acetyl Choline	146.118
	Spermidine	146.165
	Hydroxyglutarate	147.03
	L-Glutamine	147.076
	L-Lysine	147.113
	L-Glutamate	148.06
	Pentose (D-Ribose D-Arabinose D-Xylose D-Lyxose)	149.046
	L-Methionine	150.058
	Methyl Adenine	150.078
	Hydroxy Phenylacetic acid	151.04
	Guanine	152.057
	Xanthine	153.041
	N-acetylHistamine	154.098
	Imidazol-5-yl-pyruvate	155.045
	L-Histidine	156.077
	Guanidine proline / 2-Aminomuconate	158.045
	Allantoin	159.052
	5-Acetamidopentanoate	160.097
	Hydroxyketoglutaric acid	161.009
	Indole carboxylic acid	162.055
	O-Acetyl-L-homoserine (Isomer L-2-Aminoadipate; N-Methyl-L-glutamate)	162.076
	Carnitine	162.113
	Deoxyhexose	163.061
	Pterin	164.057
	3-Formylsalicylic acid (Phthalate)	165.02
	Coumaric acid (But careful fragments of Tyrosine)	165.055
	Methionine S-oxide	166.053
	L-Phenylalanine	166.086
	Hydroxyguanine	168.049
	Pyridoxal	168.066
	Glyceraldehyde-Phosphate	168.991
	Urate	169.036
	L-Noradrenaline	170.081
	Pyridoxine	170.081
	1-Methylhistidine	170.092
	Glyceraldehyde phosphate	171.006
	Glycerolphosphate	171.006
	Phenol phosphate	171.992
	cis-Aconitate (Bad Shape)	173.009
	2-Isopropyl-3-oxosuccinate	173.046
	N-Acetyl-L-glutamate 5-semialdehyde	174.076
	Indospicine	174.124
	Ascorbic acid	175.024
	Ornithine acetate	175.108
	L-Arginine	175.119
	N-AcetylAspartate	176.056
	L-Citrulline	176.103
	Gluconolactone	177.04
	Glucose,Frutose, Galactose (Hexose)	179.056
	Diaminocyclohexane tetraol	179.103
	Xanthopterin	180.052
	Hexitol	181.071
	D-Sorbitol	181.072
	Dihydroxanthopterin	182.068
	L-Tyrosine	182.081
	4-Pyridoxate	184.061
	Phosphocholine +	184.073
	3-Methoxy-4-hydroxyphenylethyleneglycol	185.08
	O-Phospho-L-serine	186.016
	Indole acrylic acid	188.071
	N2-Acetyl-L-aminoadipate semialdehyde	188.092
	N-acetylspermidine	188.176
	N6-Acetyl-L-lysine	189.16
	Kynurenic acid	190.05
	N-AcetylGlutamate	190.071
	Citric acid (Bad Shape)	191.019
	meso-2,6-Diaminoheptanedioate	191.103
	5-Hydroxyindoleacetate	192.066
	Oxoxanthopterin	192.075
	D-Gluconic acid	195.051
	Hydromethyldeoxyhydropterin	196.047
	DOPA quinone	196.061
	Methyl Tyrosine	196.097
	Ribitol, FA adducts	197.067
	Valine phosphate	198.053
	DOPA	198.076
	Erythrose-4-Phosphate	199.001
	Formyl Val-Gly	203.103
	Leu-Ala	203.139
	O-Acetylcarnitine	204.123
	L-Tryptophan	205.097
	N6-Acetyl-N6-hydroxy-L-lysine	205.118
	Quinaldic acid	206.045
	Xanthurenate	206.045
	Cyclothionine	206.048
	Kynurenine	209.092
	4-Hydroxyphenylacetylglycine	210.076
	Dethiobiotin	215.139
	Pro-Val	215.139
	Diacetyl ornithine	217.118
	Acetylarginine	217.13
	Propylcarnitine	218.139
	N2-(D-1-Carboxyethyl)-L-lysine	219.134
	Pantothenic acid	220.118
	Hydroxytryptophan	221.092
	Pyrimidodiazopterin	222.099
	Guanidino Inositol	222.109
	L-Cystathionine	223.075
	Glucoheptonic acid	225.062
	Hexose FA adducts	225.062
	3-Hydroxy-L-kynurenine	225.087
	4-Amino-4-deoxychorismate	226.071
	Ribose-1-Phosphate (Pentose Phosphate)	229.012
	Ribose-5-Phosphate (Pentose Phosphate)	229.012
	Xylulose-5-Phosphate (Pentose Phosphate)	229.012
	Leu Pro	229.155
	Myristamide	230.248
	PropionylArginine	231.145
	Valineleucine	231.171
	Dehydrobiopterin	236.078
	Methyl Guanidino inositol	236.125
	N-FormylKynurenine	237.087
	Dihydrobiopterin	240.109
	L-Cystine	241.031
	L-Cytidine	244.093
	Uridine	245.077
	Leu-Leu	245.186
	Octopine	247.14
	Deoxyadenosine	252.109
	PhosphoArginine	255.086
	Glycyl-Dopa	255.098
	D-Glucosamine 6-phosphate	258.038
	Glycerophosphocholine	258.11
	Glucose phosphate Hexose Phosphate	259.022
	a-D-Galactose-1-Phosphate	259.022
	D-Fructose-1-Phosphate (Hexose Phosphate)	259.022
	D-Fructose-6-Phosphate (Hexose Phosphate)	259.022
	Tyrosine phosphate	262.048
	2,3-Bisphospho-D-glycerate	264.952
	Thiamine	265.112
	Adenosine	268.104
	Homocystine	269.062
	Inosine	269.088
	Narigenin	273.075
	Aminohexadecanediol	274.274
	Linoleamide	280.264
	Methyl Adenosine	282.12
	Oleoamide	282.28
	Guanosine	284.099
	Xanthosine	285.083
	Methyl Dihydroinosine	285.12
	Ophthalmic acid	290.135
	N-Succinyl-LL-2,6-diaminoheptanedioate	291.119
	Argininosuccinic acid	291.13
	Cinchonine	295.18
	5'-Methylthioadenosine	298.097
	Methyl Guanosine	298.115
	N-Acetyl-alpha-D-glucosamine 1-phosphate	300.049
	Dihydromethylguanosine	300.131
	GSH	308.091
	Fructosyllysine	309.165
	Pentose-hexose	311.098
	Butoctamide semisuccinate	316.212
	Cytidine monophosphate	324.059
	Uridine monophosphate	325.043
	Galactosylhydroxylysine	325.161
	cAMP	330.06
	Nicotinate D ribonucleotide	335.064
	cGMP	346.055
	AMP	348.071
	IMP	349.054
	Lactose ammonium	360.151
	Guanidinosphingolipid	361.134
	GMP	364.065
	Drosopterin	369.153
	Riboflavin	377.146
	SuccinylAdenosine	384.115
	Lactose, Maltose, Melibiose, Sucrose, ( H and FA adducts)	387.115
	S-adenosylmethionine	399.144
	Xanthomattin	424.079
	Linolenylcarnitine	424.343
	Linolylcarnitine	426.359
	Oleoylcarnitine	428.374
	Folate	442.147
	Tetrahydrofolate	446.179
	N6-(1,2-Dicarboxyethyl)-AMP	464.082
	Taurocholate	516.299
	Protoporphyrin	563.265
	Uridine 5-diphophoglucose	565.048
	Billirubin	585.27
	Glutathione Disulfide	613.159
	NAD+	664.117
	Tetrahexose	665.212
	Pentahexose	863.242
